# Supplementary material
Source: MDPI journal article supplement (https://www.mdpi.com/2673-9976/6/1/102)
Supplement: s1 [file s1]

Nerea Núñez<sup>(1)\*</sup>, Josep Pons<sup>(1)</sup>, Javier Saurina<sup>(1,2)</sup>, Oscar Núñez<sup>(1,2)</sup>

<sup>(1)</sup> Department of Chemical Engineering and Analytical Chemistry, University of Barcelona, Martí i Franquès, 1-11, 08028 Barcelona, Spain.

<sup>(2)</sup> Research Institute in Food Nutrition and Food Safety, University of Barcelona, Recinte Torribera, Av. Prat de la Riba 171, Edifici de Recerca (Gaudi), 08921, Santa Coloma de Gramenet, Barcelona, Spain.

## INTRODUCTION

Food products are very complex matrices, which makes the quality of these products an issue of great interest in our society. Considering the complexity of the food chain, the adulteration of food is increasing, causing food fraud cases. In this field, drinks are food products that can be very easily adulterated. This work will focus on the thematic of fraud detection in coffee, one of the most popular beverages in the world. Coffee contains an elevated number of bioactive substances (phenolic acids, polyphenols and alkaloids) that give place to its important antioxidant activity, known for its beneficial health effects. In addition, a growing tendency is the coffee adulteration with non coffee materials such as corn, barley, rice, brown sugar, soybean, among others, to reduce cost production and increase economic benefits. These practices are illegal and have not only economic consequences but could also imply a danger to the consumer health. Is for these reasons that food quality control of commercial coffee products to ensure coffee authenticity and to protect the consumers is very important.

## OBJECTIVE

Development of rapid non-targeted FIA-ESI-MS fingerprinting method in combination with chemometrics to achieve the Characterization, Classification and Authentication of coffee samples, together with possible adulterants (barley, chicory and flours) using PLS-DA in order to try to prevent frauds in the future. Furthermore, PLS regression was employed to detect and quantify adulterant levels on adulterated Arabica and Robusta coffee samples.

## EXPERIMENTAL PROCESS

### SAMPLES

| Sample Class | Sample Type                                   | Number of Samples |
|--------------|-----------------------------------------------|-------------------|
| Coffee       | Vietnamese Arabica coffee                     | 13                |
|              | Vietnamese Robusta coffee                     | 26                |
|              | Vietnamese Arabica and Robusta mixture coffee | 9                 |
|              | Cambodian coffee (Unknown specie)             | 6                 |
| Chicory      | Chicory                                       | 21                |
| Barley       | Barley                                        | 6                 |
| Flour        | Wheat flour                                   | 7                 |
|              | Rice flour                                    | 4                 |
|              | Corneal flour                                 | 11                |
|              | Rye flour                                     | 15                |
|              | Oatmeal flour                                 | 5                 |

### Sample treatment

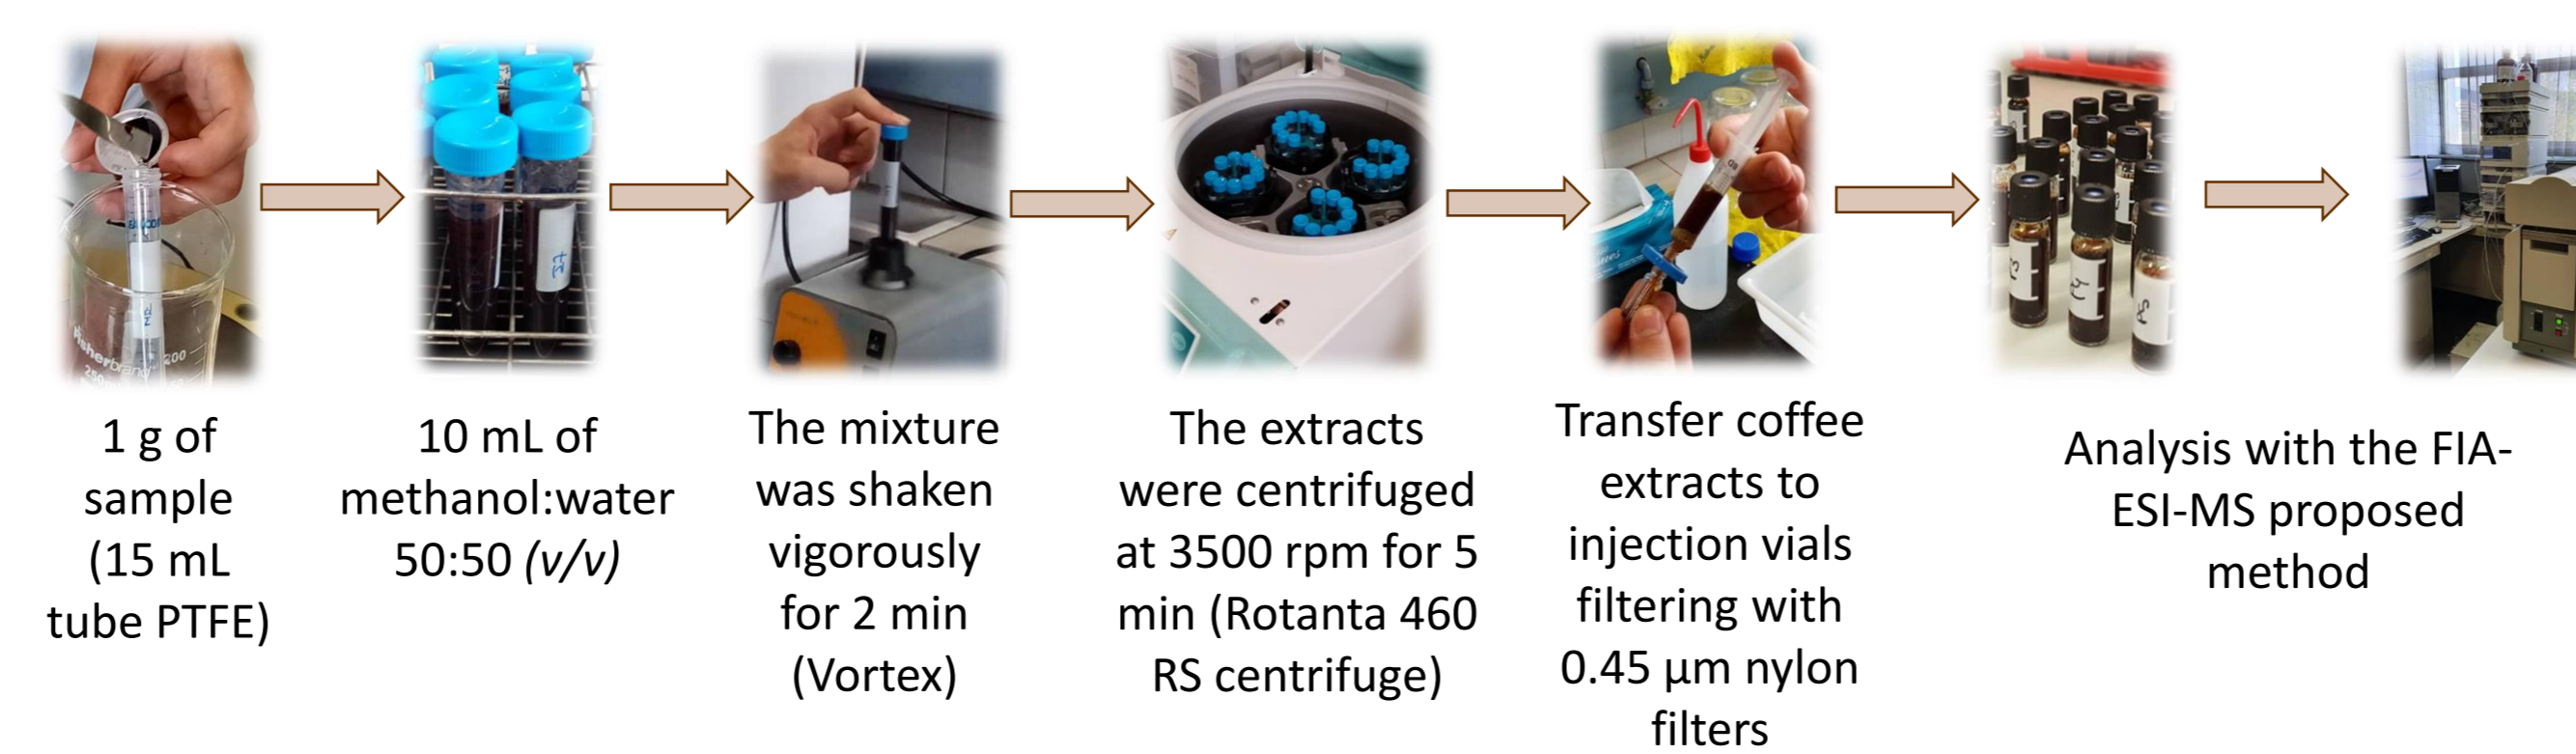

### INSTRUMENTATION AND CONDITIONS

#### Non-targeted FIA-ESI-MS fingerprinting method

| Instrument        | 4000 QTrap mass spectrometer  |
|-------------------|-------------------------------|
| Ionization source | Electrospray in negative mode |
| Acquisition       | Full scan (m/z 100 - 550)     |
| Scan time         | 1.5 minutes                   |

| Optimised parameters of ESI source   |       |
|--------------------------------------|-------|
| Curtain gas (psi)                    | 10    |
| Collisionally Activated Dissociation | -3    |
| Nebulizing gas (psi)                 | 50    |
| Drying gas (psi)                     | 50    |
| Spray voltage (V)                    | -2500 |
| Temperature (°C)                     | 400   |
| Declustering potential (V)           | -80   |
| Collision Energy                     | -5    |

## RESULTS

### CHEMOMETRICS

#### NEGATIVE MODE RESULTS

##### PLS-DA SCORES PLOT OF NON ADULTERATED SAMPLES

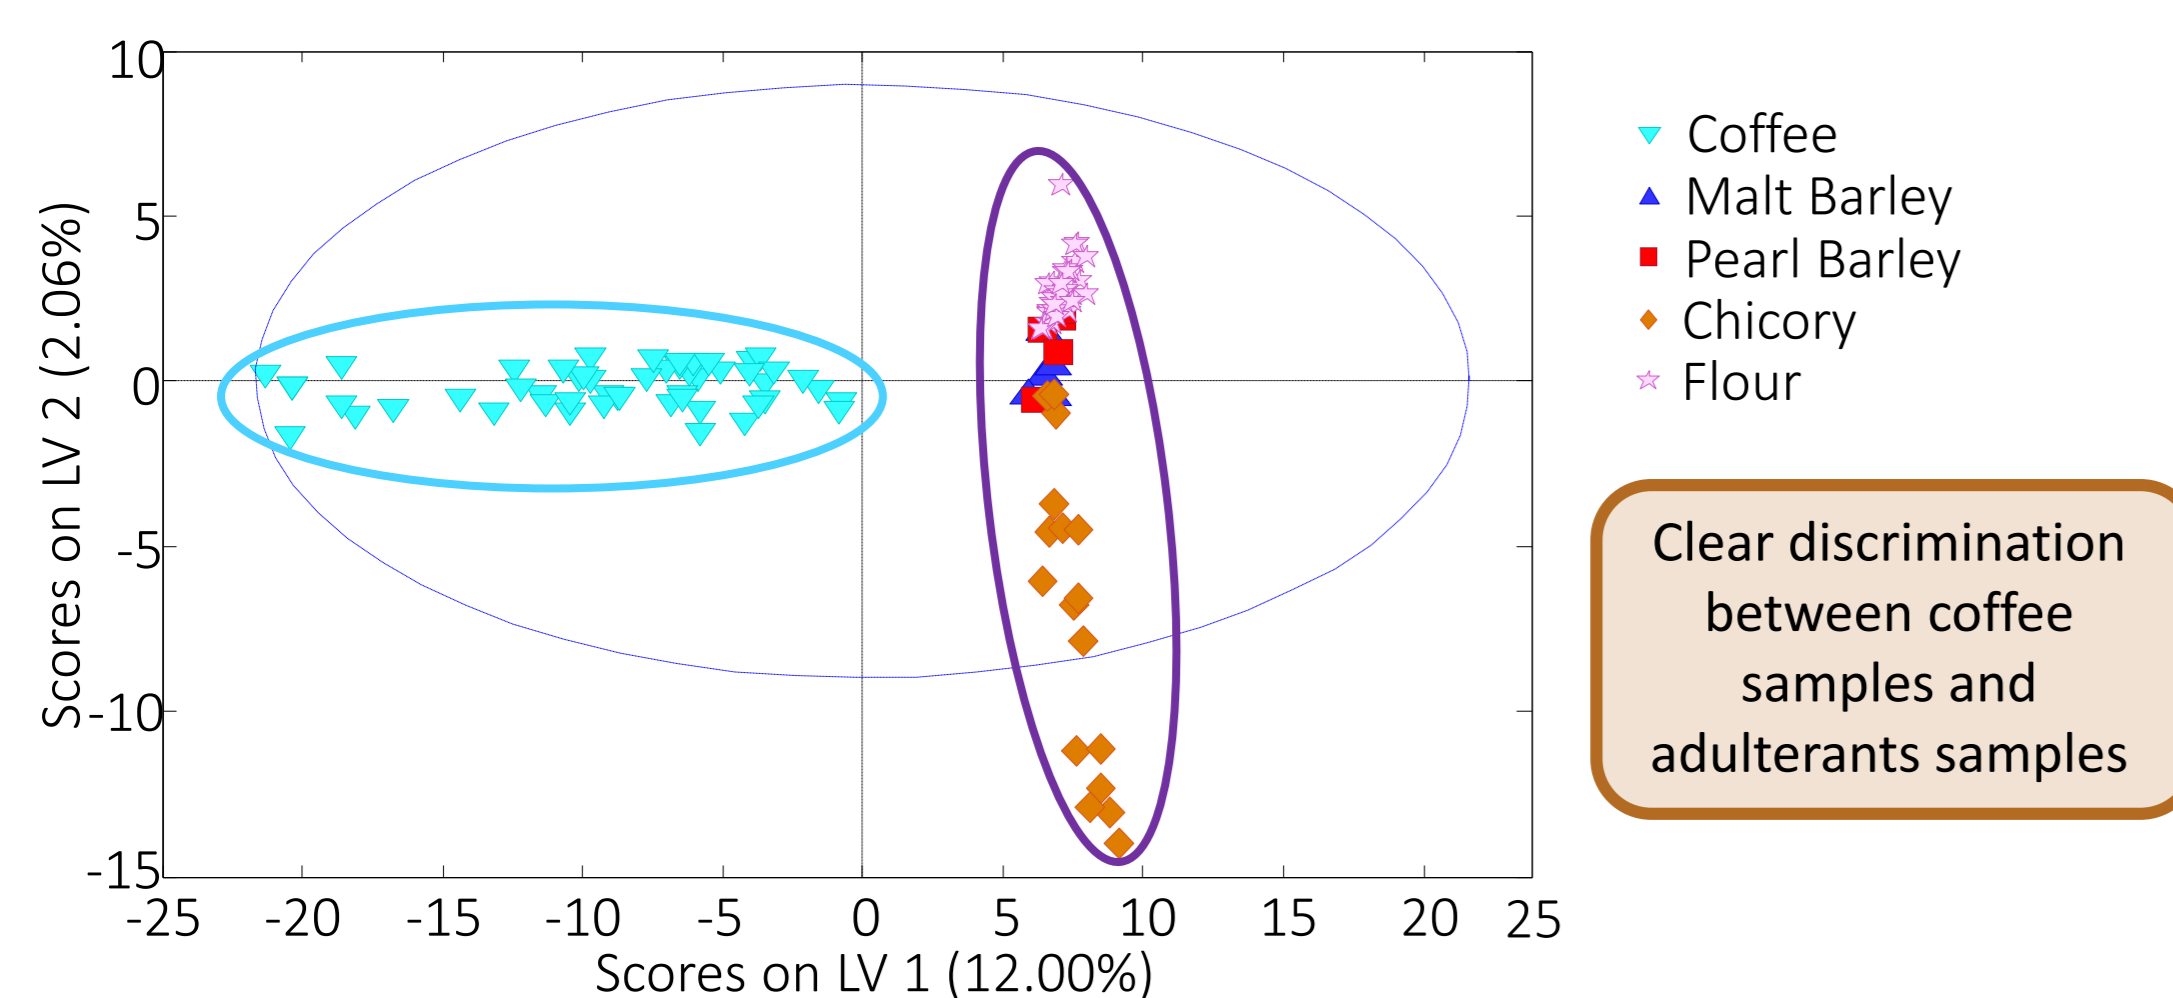

##### PLS-DA VALIDATION

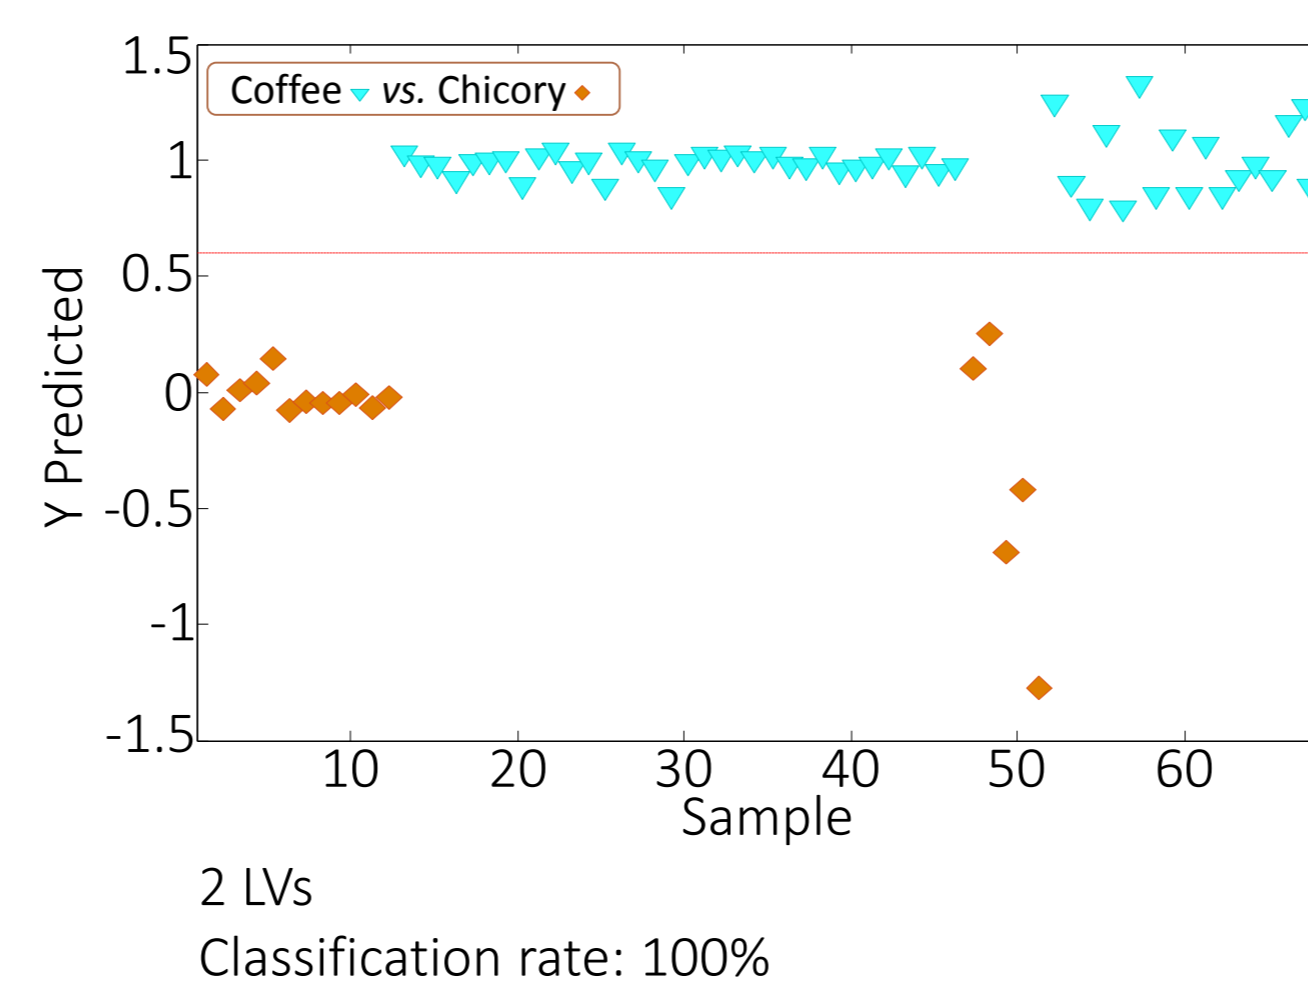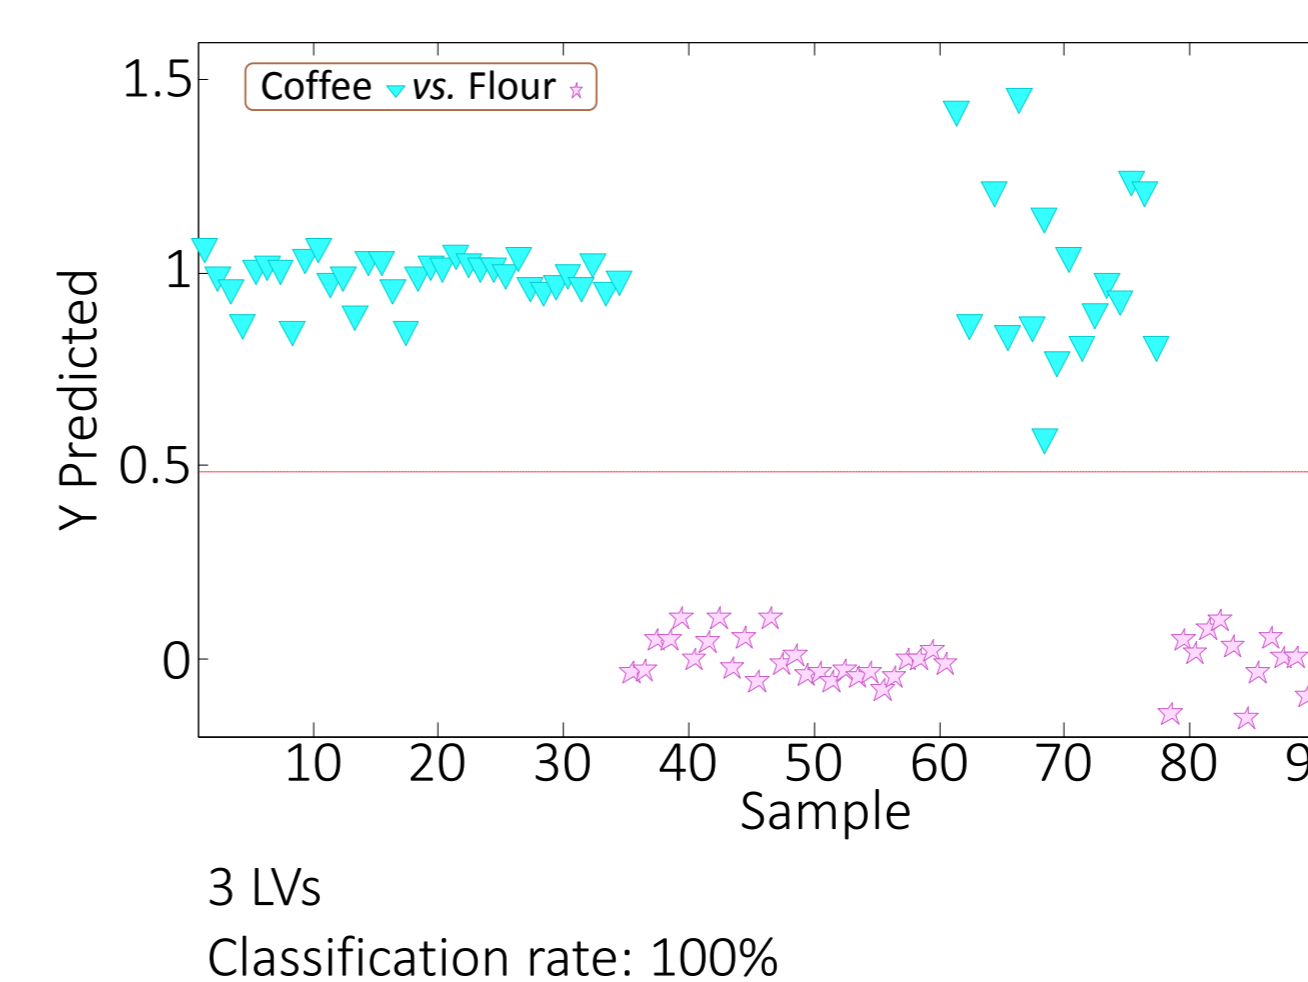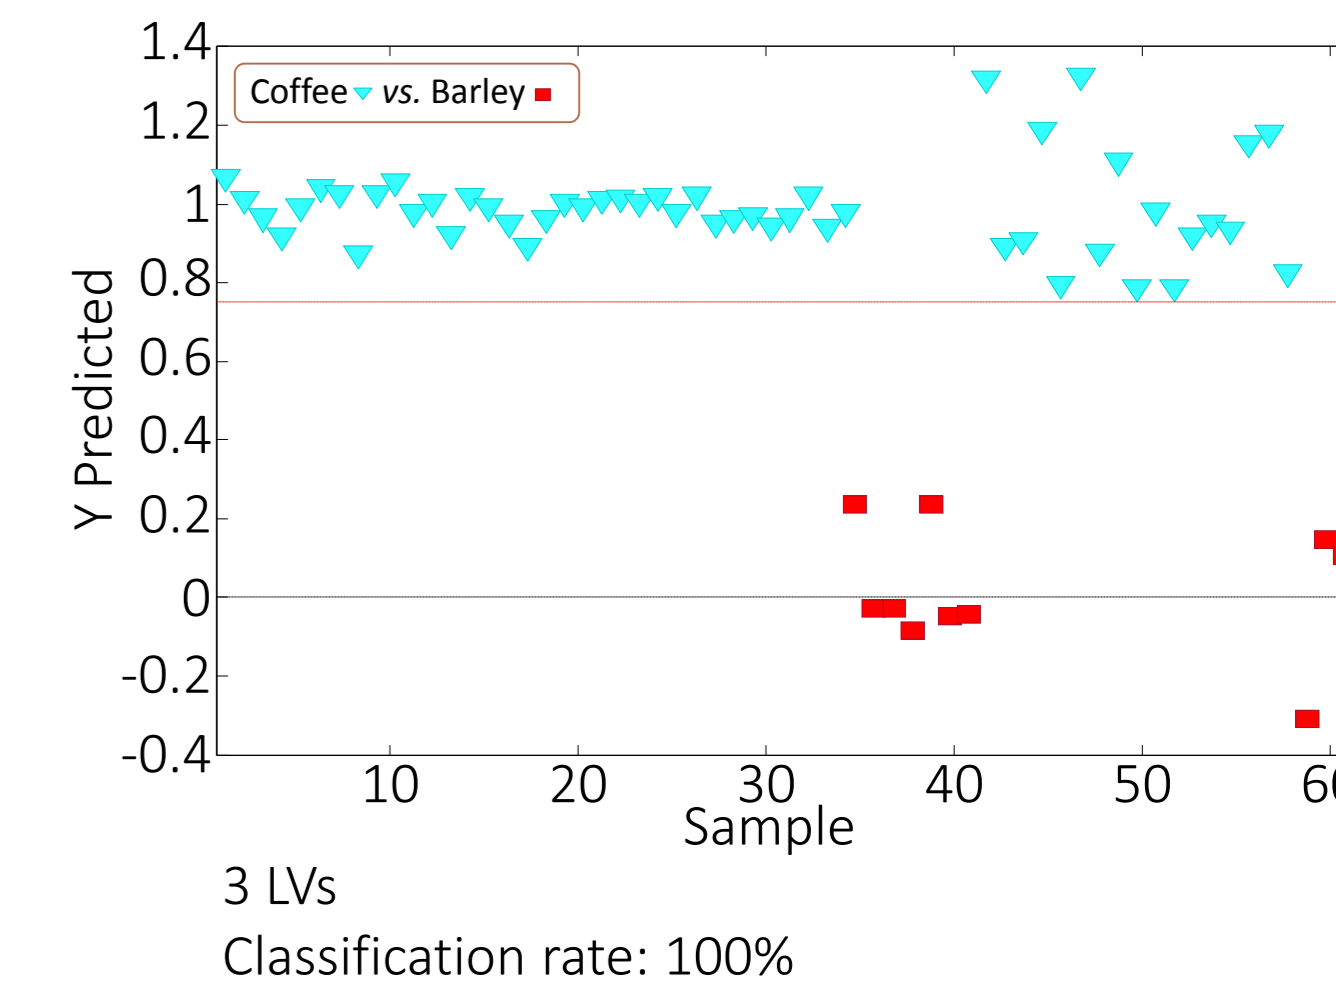

##### SCORES PLOTS OF ADULTERATED ARABICA AND ROBUSTA SAMPLES

###### PLS-DA models

(In all of them, samples tend to be distributed according to the level of the adulterant coffee)

###### Arabica Coffee vs. Chicory

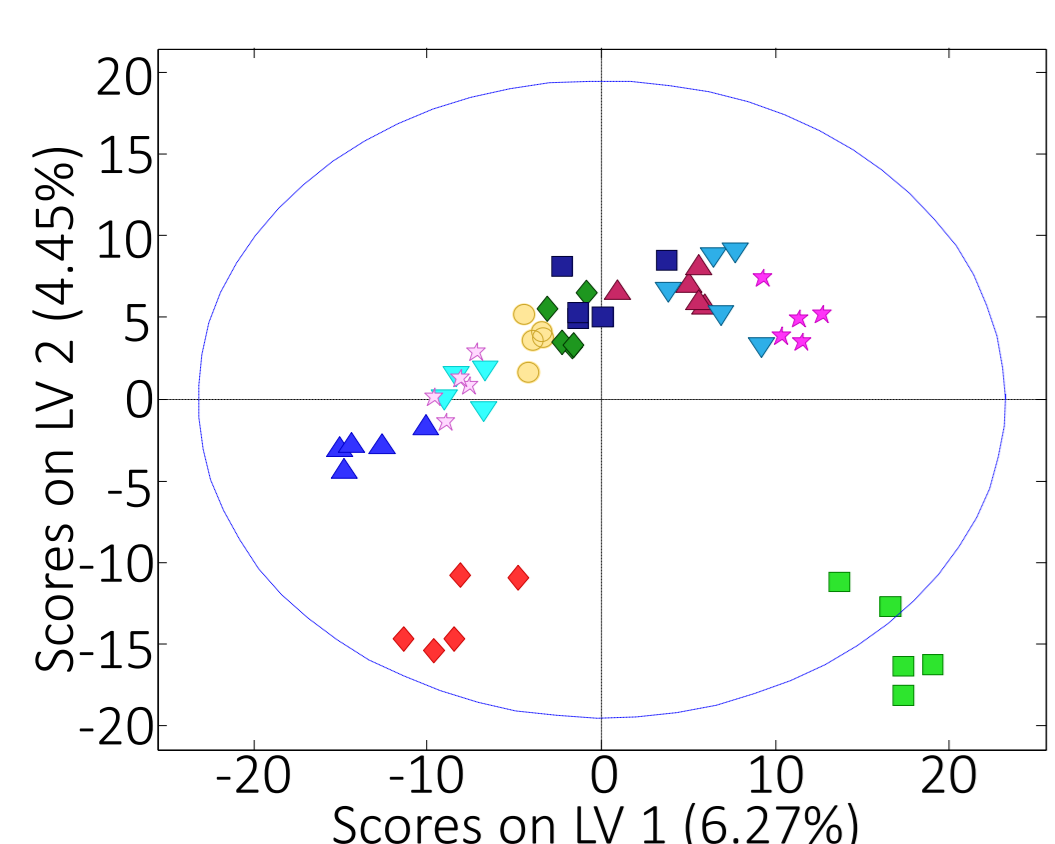

###### Arabica Coffee vs. Flour

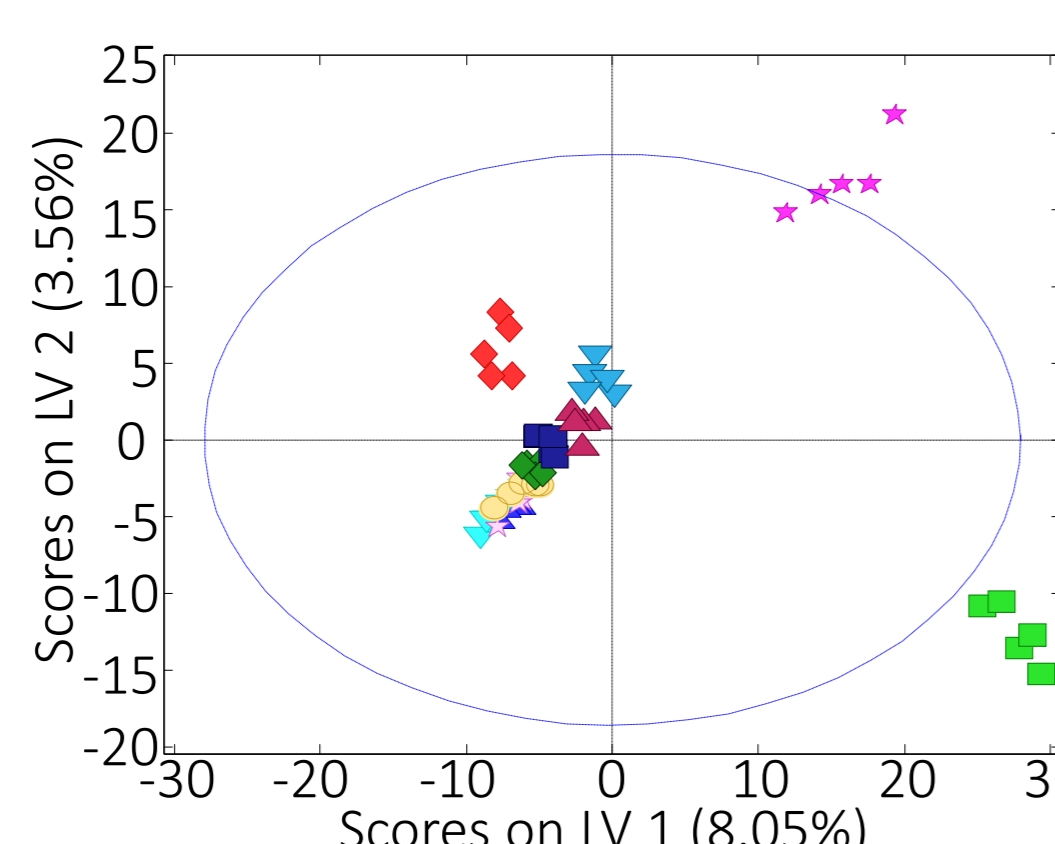

###### Arabica Coffee vs. Barley

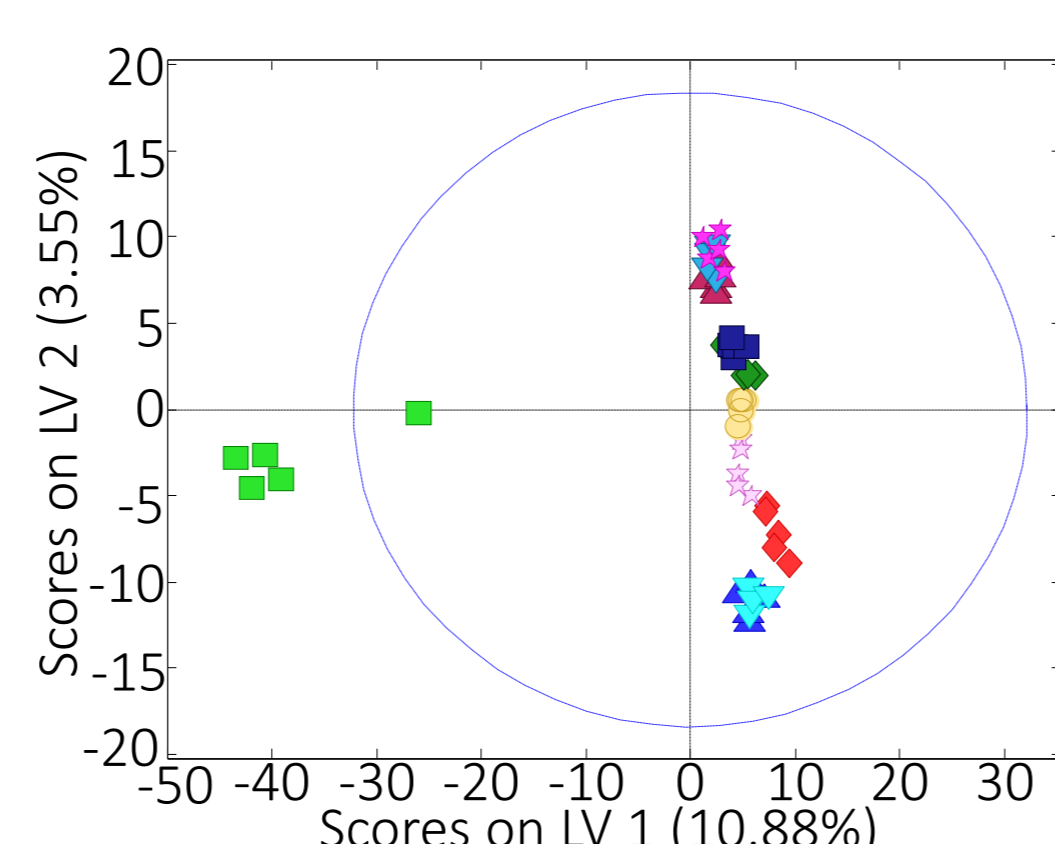

###### Robusta Coffee vs. Chicory

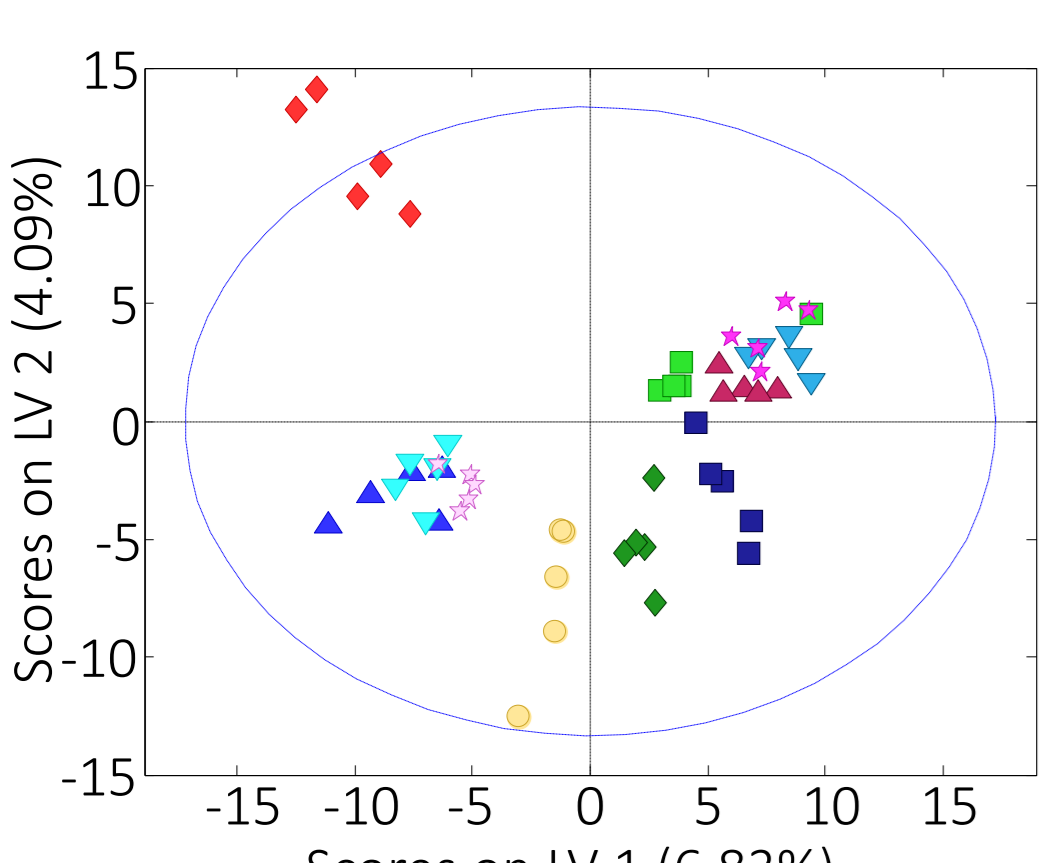

###### Robusta Coffee vs. Flour

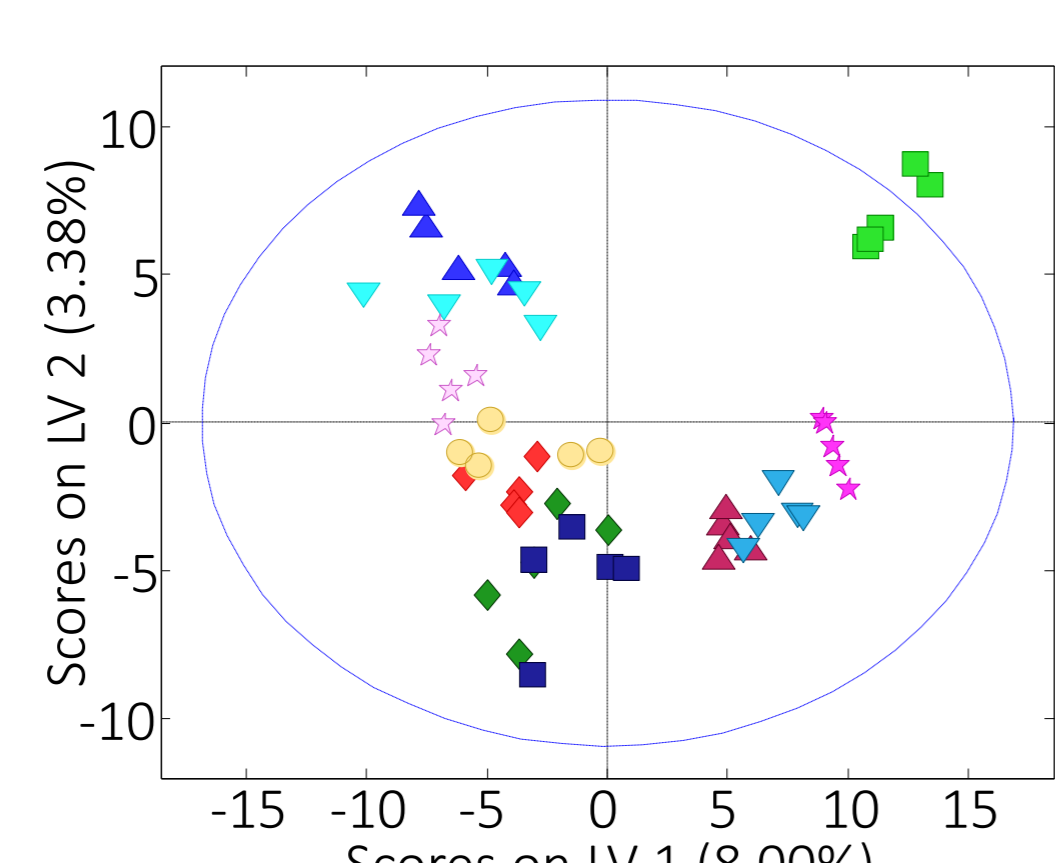

###### Robusta Coffee vs. Barley

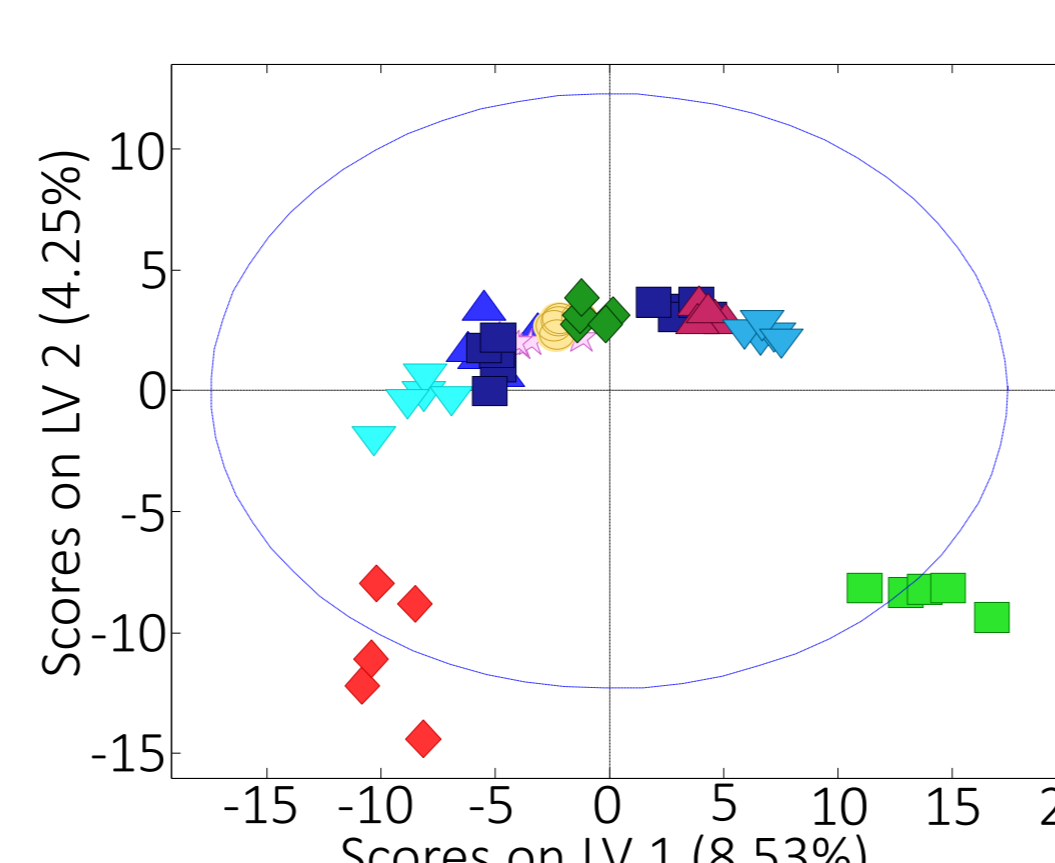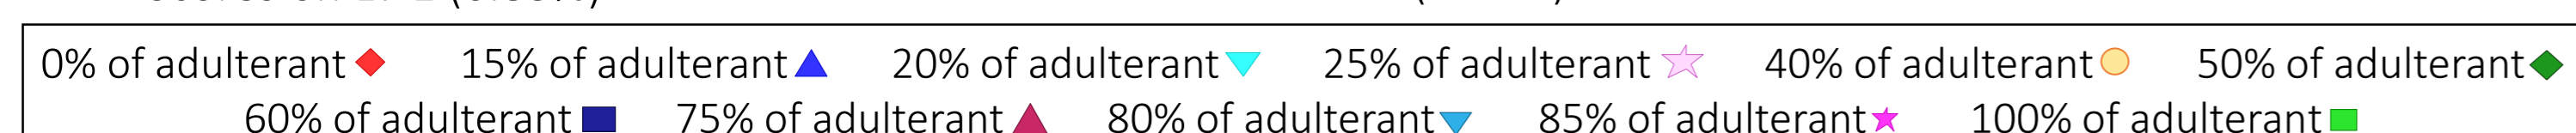

###### PLS models

(Dark and blue symbols correspond to calibration and validation sets)

###### Arabica Coffee vs. Chicory

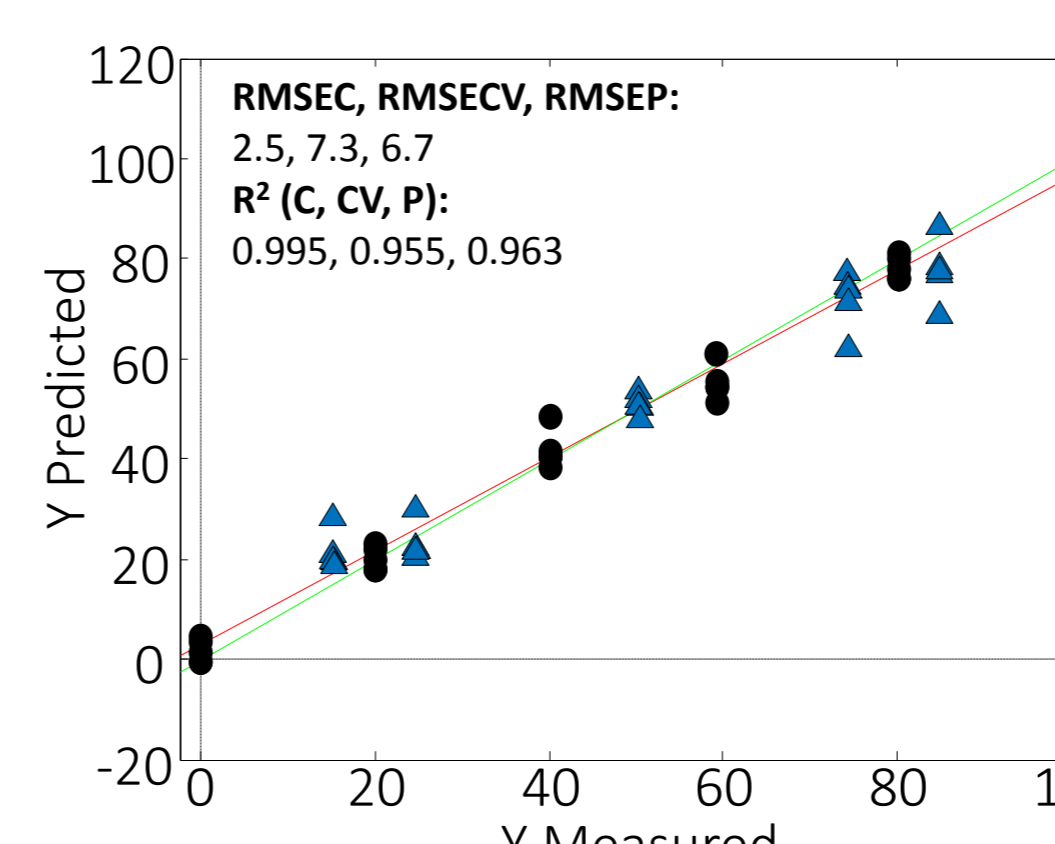

###### Arabica Coffee vs. Flour

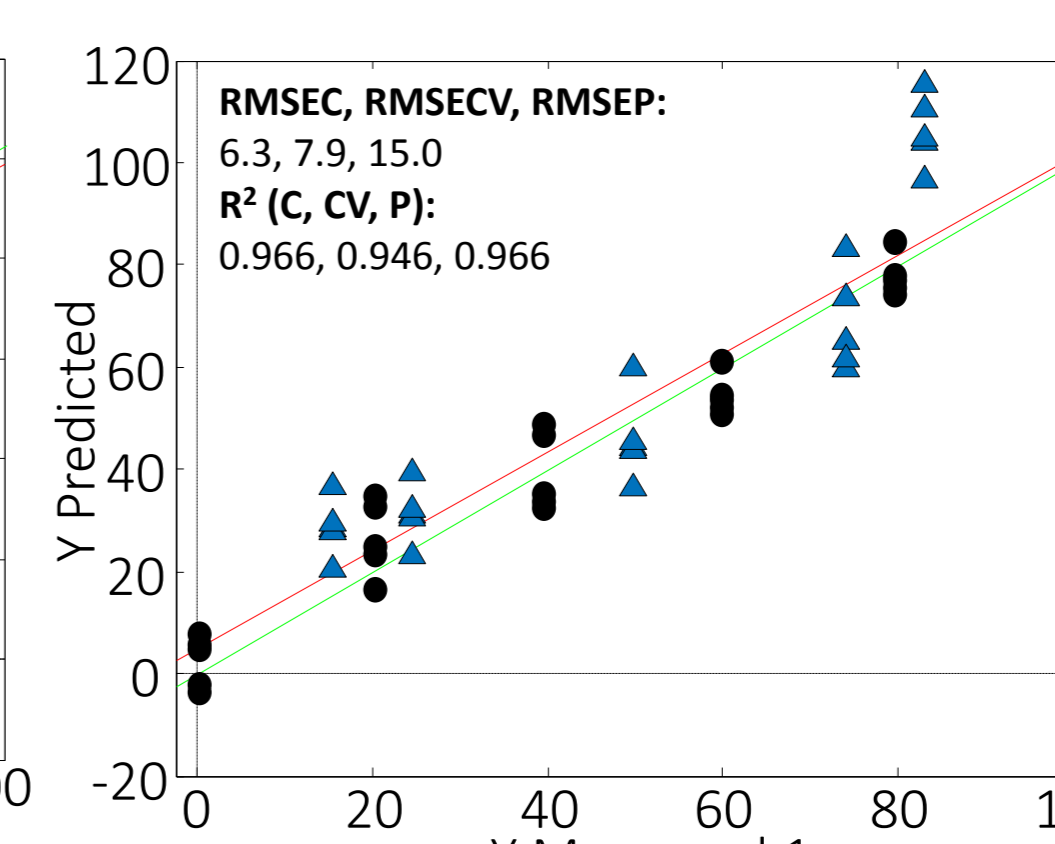

###### Arabica Coffee vs. Barley

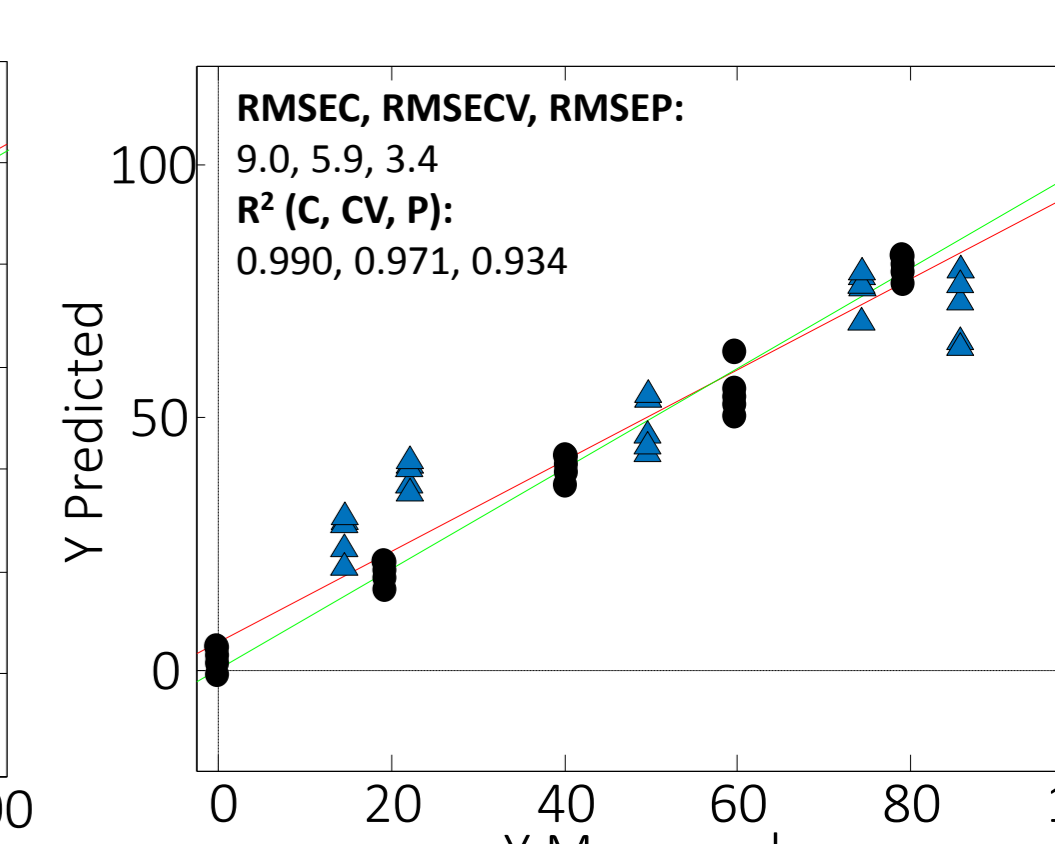

###### Robusta Coffee vs. Chicory

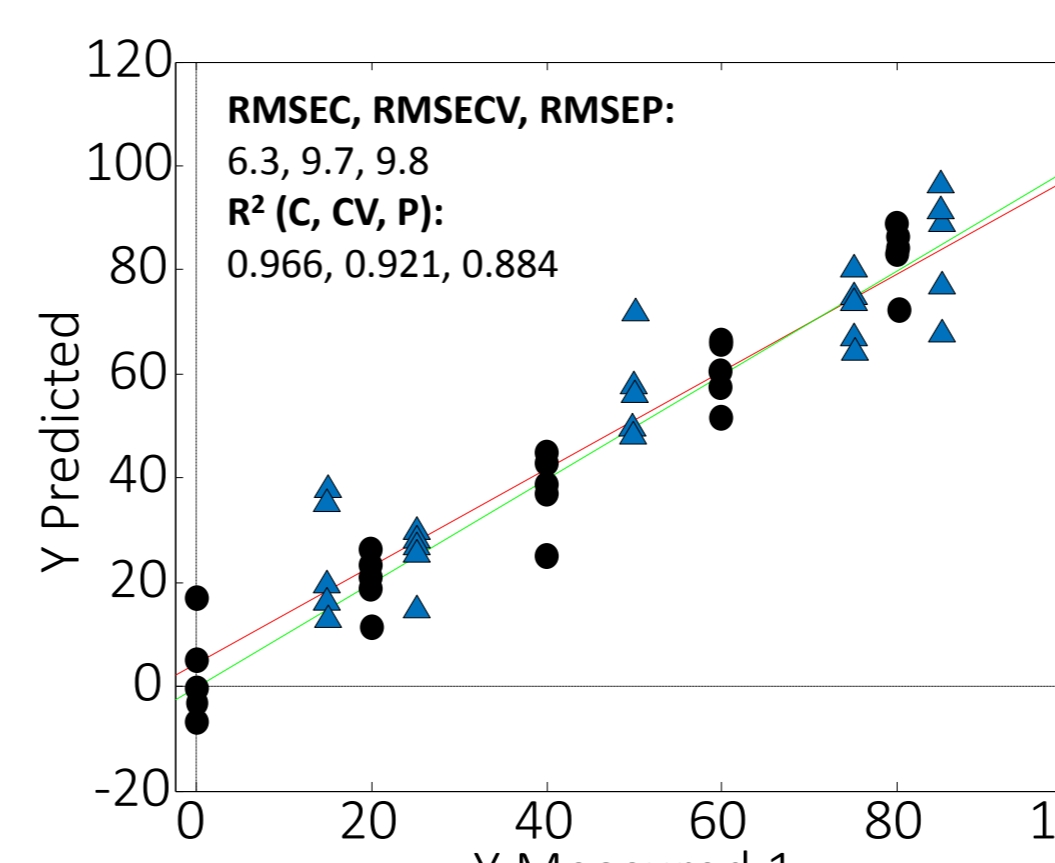

###### Robusta Coffee vs. Flour

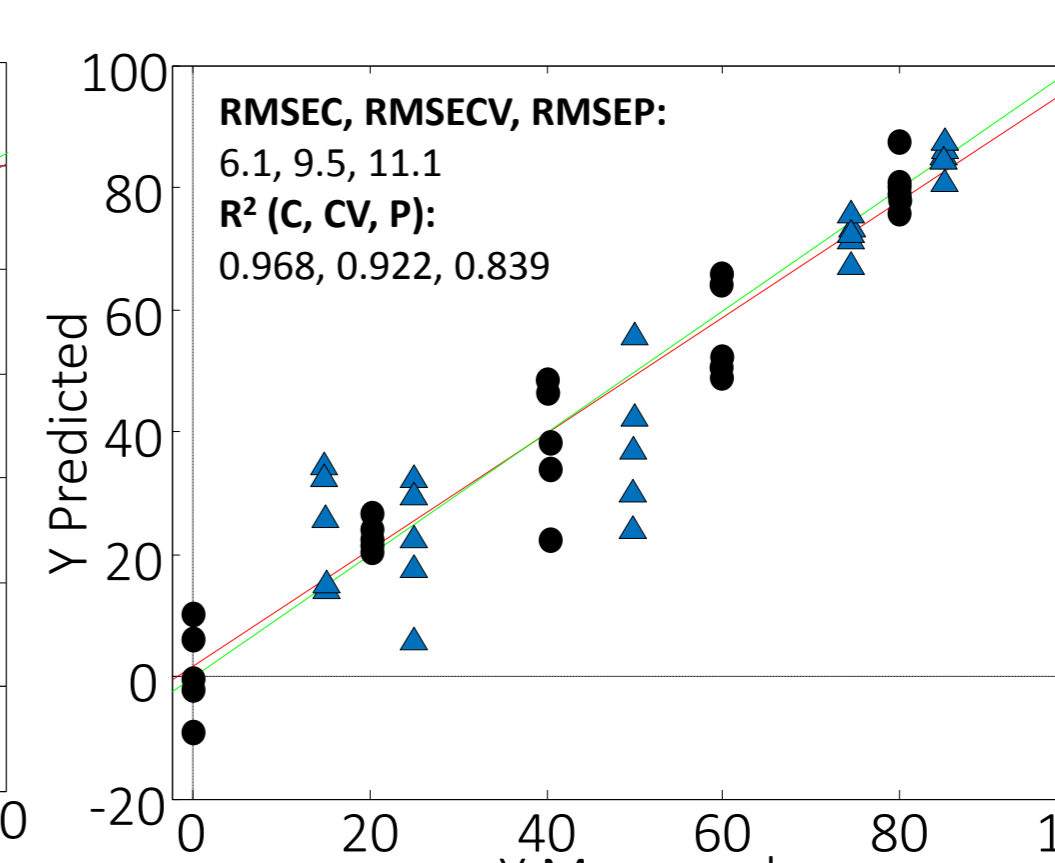

###### Robusta Coffee vs. Barley

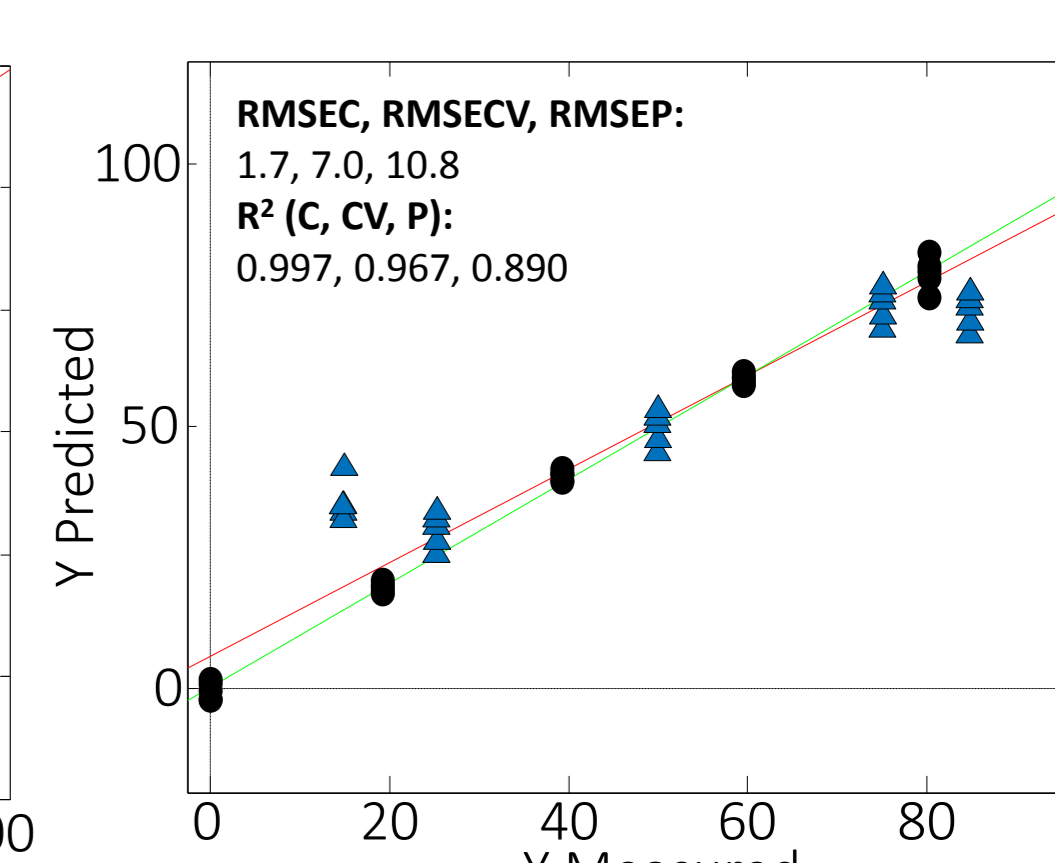

## CONCLUSIONS

- FIA-ESI-MS fingerprinting method were developed for the classification of coffees and some adulterants.
- The proposed FIA-ESI-MS method provided suitable chemical descriptors to address the characterization, classification and authentication of coffee samples in front adulterants like chicory, flour and barley.
- Chemometric analysis of the obtained chemical descriptors allowed the classification of the analyzed coffee and adulterant samples.
- The proposed PLS-DA methods were validated for the authentication of Arabica and Robusta coffee samples obtaining classification rates of 100%.
- PLS-DA chemometric analysis for adulterated samples using the fingerprints provided by the proposed method revealed patterns that were perfectly correlated to the percentage of adulteration.
- Satisfactory errors of calibration, cross validation and prediction, as well as good linearity, were obtained for most of the studied cases with PLS models.
- The proposed method will be useful in the future in the field of coffee authentication for the prevention of frauds.

## REFERENCES

- N. Núñez, J. Saurina, O. Núñez, Authenticity Assessment and Fraud Quantitation of Coffee Adulterated with Chicory, Barley, and Flours by Untargeted HPLC-UV-FLD Fingerprinting and Chemometrics, *Foods* (2021), 10, 840

## ACKNOWLEDGEMENTS

- The authors thank the financial support received from Agencia Estatal de Investigación (project PID2020-114401RB-C22) and from the Agency for Administration of University and Research Grants (Generalitat de Catalunya) (projects 2017SGR-171 and 2017SGR-310).
